# Supplementary material
Source: publisher figshare collection journal article supplement (https://gsapubs.figshare.com/ndownloader/files/23300999)
Supplement: Supplementary file 1 [file 23300999]

Apatite fission-track and Re-Os geochronology of the Xuefeng uplift, China:  
Temporal implications for dry gas associated hydrocarbon systems

**Xiang Ge<sup>1,2</sup>, Chuanbo Shen<sup>1\*</sup>, David Selby<sup>2</sup>, Dafei Deng<sup>1,3</sup>, Lianfu Mei<sup>1</sup>**

*<sup>1</sup>Key Laboratory of Tectonics and Petroleum Resources (China University of Geosciences),  
Ministry of Education, Wuhan, 430074, China*

*<sup>2</sup>Department of Earth Sciences, Durham University, Durham, DH1 3LE, UK*

*<sup>3</sup>Institute of China National Offshore Oil Company Ltd, Shenzhen, Guangzhou, 510240,  
China*

## **Analytical protocols**

Apatite Fission Track analysis was conducted at Apatite to Zircon, Inc., following the protocols of (Donelick et al., 2005). In brief, the apatite grains were isolated using standard mineral separation techniques (crushing, magnetism, heavy liquids and hand picking under a binocular microscope) from the sandstone samples. The apatite grains were then mounted in resin, polished, and etched by a eutectic melt of NaOH + KOH (at ~220°C) for 12-72 hours to expose the fission tracks. The polished and etched grains were then cleaned in reagent-grade 48% HF for 15 minutes at 23°C. The amount and the density of the fission track lengths were measured at 1562.5x dry magnification using unpolarized transmitted light and a Nikon Optiphot 2 microscope. The concentration of U in the apatite was determined by instruments of New Wave YAG 213 nm laser ablation (LA) system in line with a Finnigan Element 2 magnetic sector, inductively coupled plasma, mass spectrometer (ICP-MS). For detailed information about the LA-ICP-MS settings and data acquisition parameters see (Shen et al., 2012).

Rhenium and Os analysis was conducted at the Laboratory for Source Rock and Sulfide Geochronology and Geochemistry (a member of the Durham Geochemistry Centre) at Durham University following the analytical protocols of ((Selby, 2007; Selby and Creaser, 2003; Selby et al., 2007)).

For Re-Os analysis, approximately ~0.2-1.0 g bitumen was separated from the limestone rocks without metal contact and crushed to ~1 mm grains using an agate pestle and mortar. Using the Carius tube technique (Shirey and Walker, 1995). Approximately 100~200 mg of bitumen were dissolved and equilibrated with a known amount of  $^{185}\text{Re}$  and  $^{190}\text{Os}$  spike solution by inverse *aqua-regia* (3 ml HCl and 6 ml HNO<sub>3</sub>) in a Carius tube for 24 hours at 220°C. Osmium was isolated and purified from the inverse *aqua-regia* by CHCl<sub>3</sub> solvent extraction at room temperature and micro-distillation. The Re was isolated using HCl-HNO<sub>3</sub>-

based anion chromatography. The purified Re and Os were loaded to Ni and Pt filaments and analyzed using negative ion thermal ionization mass spectrometry (NTIMS, (Creaser et al., 1991; Völkening et al., 1991)) on a ThermoElectron (TRITON) mass spectrometer. Re was measured using Faraday collectors and Os in peak hopping mode using a secondary electron multiplier (SEM).

Total procedural blanks for Re and Os are <3 and <1 pg, respectively, with an average  $^{187}\text{Os}/^{188}\text{Os}$  ratio of ~0.25, and all the data were blank corrected (n=3). All uncertainties include the propagated uncertainty in the standard, spike calibrations, mass spectrometry measurements, and blanks. In-house Re (Restd) and Os (DROsS) solutions were analyzed as a monitor of reproducibility of isotope measurements. The  $^{187}\text{Os}/^{188}\text{Os}$  values of the Os standard solution DROsS during this study were  $0.1611 \pm 0.0066$ , with the  $^{185}\text{Re}/^{187}\text{Re}$  values of the Re standard solution being  $0.5984 \pm 0.0002$ . These values are in agreement with those previously published for DROsS and Restd (Cumming et al., 2014; Finlay et al., 2011, 2012; Lillis and Selby, 2013; Rooney, 2011). The Re–Os data of this study are regressed using the program *Isoplot* V. 4.15 (Ludwig, 2003) with  $^{187}\text{Re}$  decay constant of  $1.666 \times 10^{-11} \text{ a}^{-1}$  (Smoliar et al., 1996). The input data contains  $^{187}\text{Re}/^{188}\text{Os}$  and  $^{187}\text{Os}/^{188}\text{Os}$  ratios with their total  $2\sigma$  uncertainty and associated error correlation, Rho.

## Reference

- Creaser, R., Papanastassiou, D., and Wasserburg, G., 1991, Negative thermal ion mass spectrometry of osmium, rhenium and iridium: *Geochimica et Cosmochimica Acta*, v. 55, no. 1, p. 397-401.
- Cumming, V. M., Selby, D., Lillis, P. G., and Lewan, M. D., 2014, Re–Os geochronology and Os isotope fingerprinting of petroleum sourced from a Type I lacustrine kerogen: Insights from the natural Green River petroleum system in the Uinta Basin and hydrous pyrolysis experiments: *Geochimica et Cosmochimica Acta*, v. 138, p. 32-56.

- Donelick, R. A., O'Sullivan, P. B., and Ketcham, R. A., 2005, Apatite fission-track analysis: Reviews in Mineralogy and Geochemistry, v. 58, no. 1, p. 49-94.
- Finlay, A. J., Selby, D., and Osborne, M. J., 2011, Re-Os geochronology and fingerprinting of United Kingdom Atlantic margin oil: Temporal implications for regional petroleum systems: Geology, v. 39, no. 5, p. 475-478.
- , 2012, Petroleum source rock identification of United Kingdom Atlantic Margin oil fields and the Western Canadian Oil Sands using Platinum, Palladium, Osmium and Rhenium: Implications for global petroleum systems: Earth and Planetary Science Letters, v. 313, p. 95-104.
- Lillis, P. G., and Selby, D., 2013, Evaluation of the rhenium–osmium geochronometer in the Phosphoria petroleum system, Bighorn Basin of Wyoming and Montana, USA: Geochimica et Cosmochimica Acta, v. 118, p. 312-330.
- Ludwig, K., 2003, A plotting and regression program for radiogenic-isotope data, version 3.00: United State Geol Survey, open file report, p. 1-70.
- Rooney, A., 2011, Re-Os geochronology and geochemistry of Proterozoic sedimentary successions: Durham University.
- Selby, D., 2007, Direct Rhenium-Osmium age of the Oxfordian-Kimmeridgian boundary, Staffin bay, Isle of Skye, UK, and the Late Jurassic time scale: Norsk Geologisk Tidsskrift, v. 87, no. 3, p. 291.
- Selby, D., and Creaser, R. A., 2003, Re–Os geochronology of organic rich sediments: an evaluation of organic matter analysis methods: Chemical Geology, v. 200, no. 3, p. 225-240.
- Selby, D., Creaser, R. A., and Fowler, M. G., 2007, Re–Os elemental and isotopic systematics in crude oils: Geochimica et Cosmochimica Acta, v. 71, no. 2, p. 378-386.

- Shen, C.-B., Donelick, R. A., O'Sullivan, P. B., Jonckheere, R., Yang, Z., She, Z.-B., Miu, X.-L., and Ge, X., 2012, Provenance and hinterland exhumation from LA-ICP-MS zircon U–Pb and fission-track double dating of Cretaceous sediments in the Jiangnan Basin, Yangtze block, central China: *Sedimentary Geology*, v. 281, p. 194-207.
- Shirey, S. B., and Walker, R. J., 1995, Carius tube digestion for low-blank rhenium-osmium analysis: *Analytical Chemistry*, v. 67, no. 13, p. 2136-2141.
- Smoliar, M. I., Walker, R. J., and Morgan, J. W., 1996, Re-Os ages of group IIA, IIIA, IVA, and IVB iron meteorites: *Science*, v. 271, no. 5252, p. 1099-1102.
- Völkening, J., Walczyk, T., and Heumann, K. G., 1991, Osmium isotope ratio determinations by negative thermal ionization mass spectrometry: *International Journal of Mass Spectrometry and Ion Processes*, v. 105, no. 2, p. 147-159.

Table DR1. Results of the Apatite fission track analysis from the Western margin of Xuefeng Uplift

| Sample name | Location  |            | Formation      | Elevation (m) | Lithology                 | nGrains | P-age (Ma) | 95%-Cl (Ma) | 95%+Cl (Ma) | nlength | Length±1σ (μm) | Dpar (μm) |
|-------------|-----------|------------|----------------|---------------|---------------------------|---------|------------|-------------|-------------|---------|----------------|-----------|
|             | Latitude  | Longitude  |                |               |                           |         |            |             |             |         |                |           |
| 3-18        | 27°57'03" | 110°07'11" | T <sub>3</sub> | 166           | sandstone, T <sub>3</sub> | 36      | 70.98      | 5.56        | 6.02        | 204     | 12.66±2.21     | 2.28      |
| 3-67        | 28°28'24" | 108°55'42" | S <sub>2</sub> | 408           | sandstone, S <sub>2</sub> | 36      | 97.67      | 6.62        | 7.09        | 205     | 12.91±1.69     | 2.56      |
| 3-97        | 28°37'48" | 108°35'28" | T <sub>2</sub> | 441           | sandstone, T <sub>2</sub> | 35      | 155.79     | 12.4        | 13.46       | 202     | 12.87±1.67     | 2.56      |
| 2-3         | 26°26'36" | 106°42'24" | J <sub>1</sub> | 1090          | sandstone, J <sub>1</sub> | 38      | 149.60     | 8.59        | 9.11        | 206     | 13.20±2.08     | 2.54      |
| 2-33        | 26°34'37" | 107°19'02" | O <sub>1</sub> | 1140          | sandstone, O <sub>1</sub> | 38      | 123.43     | 7.29        | 7.75        | 200     | 13.71±1.43     | 2.52      |

Footnote: T<sub>3</sub> = Late Triassic Xiaojiangkou formation, S<sub>2</sub> = Middle Silurian Shiniulan formation, T<sub>2</sub> = Middle Triassic Guangling formation, J<sub>1</sub> = Early Jurassic Ziliujing Formation, O<sub>1</sub> = Early Ordovician Dawan formation

Table DR2. Re-Os isotopic data for Type A and B bitumen from the Majiang and Wanshan reservoirs of the Xuefeng Uplift.

| Sample name    | Location  |            | Re (ppb) | ±    | Os (ppt) | ±   | <sup>187</sup> Re/ <sup>188</sup> Os | ±    | <sup>187</sup> Os/ <sup>188</sup> Os | ±    | rho   | <sup>a</sup> IOs (430) |                       |
|----------------|-----------|------------|----------|------|----------|-----|--------------------------------------|------|--------------------------------------|------|-------|------------------------|-----------------------|
|                | Latitude  | Longitude  |          |      |          |     |                                      |      |                                      |      |       |                        |                       |
| Type A bitumen |           |            |          |      |          |     |                                      |      |                                      |      |       |                        |                       |
| WL-B01         | 26°40'48" | 107°49'09" | 4.32     | 0.03 | 206.4    | 1.1 | 121.2                                | 1.7  | 1.66                                 | 0.02 | 0.824 | 0.79                   |                       |
| WL-B02         | 26°40'48" | 107°49'09" | 1.67     | 0.03 | 84.4     | 1.0 | 113.6                                | 3.7  | 1.62                                 | 0.05 | 0.847 | 0.80                   |                       |
| WL-B04         | 26°40'49" | 107°49'09" | 2.73     | 0.03 | 131.2    | 1.1 | 120.4                                | 2.5  | 1.66                                 | 0.03 | 0.845 | 0.79                   |                       |
| WL-B05         | 26°40'49" | 107°49'09" | 2.67     | 0.03 | 134.9    | 1.1 | 113.6                                | 2.3  | 1.60                                 | 0.03 | 0.833 | 0.79                   |                       |
| WL-B06         | 26°40'48" | 107°49'10" | 1.52     | 0.03 | 76.5     | 1.0 | 114.2                                | 4.1  | 1.62                                 | 0.05 | 0.848 | 0.80                   |                       |
| Type B bitumen |           |            |          |      |          |     |                                      |      |                                      |      |       | <sup>b</sup> IOs (70)  | <sup>c</sup> IOs (80) |
| MJ1-2          | 26°14'02" | 107°45'05" | 8.19     | 0.05 | 98.5     | 1.6 | 497.0                                | 13.8 | 1.97                                 | 0.08 | 0.689 | 1.39                   | 1.31                  |
| MJ-S1-B        | 26°29'25" | 107°34'42" | 6.14     | 0.04 | 217.7    | 3.6 | 163.4                                | 4.9  | 1.68                                 | 0.07 | 0.711 | 1.49                   | 1.46                  |
| MJ-S2-B        | 26°29'25" | 107°34'43" | 9.43     | 0.11 | 340.3    | 3.8 | 157.9                                | 3.3  | 1.53                                 | 0.04 | 0.608 | 1.34                   | 1.31                  |
| MJ-S4-B        | 26°29'26" | 107°34'42" | 15.28    | 0.28 | 423.7    | 4.7 | 206.3                                | 5.2  | 1.56                                 | 0.04 | 0.489 | 1.32                   | 1.29                  |
| HBZ-S1-B       | 26°14'43" | 107°33'53" | 4.86     | 0.04 | 314.8    | 6.7 | 88.4                                 | 3.7  | 1.56                                 | 0.09 | 0.697 | 1.46                   | 1.45                  |
| HBZ-S4-B       | 26°14'44" | 107°33'53" | 7.93     | 0.05 | 323.8    | 4.2 | 140.4                                | 3.1  | 1.58                                 | 0.05 | 0.700 | 1.42                   | 1.39                  |
| HBZ-S6-B       | 26°14'43" | 107°33'54" | 5.36     | 0.04 | 354.0    | 5.6 | 86.8                                 | 2.5  | 1.58                                 | 0.06 | 0.687 | 1.47                   | 1.46                  |
| HBZ-S7-B       | 26°14'44" | 107°33'54" | 8.44     | 0.05 | 498.1    | 7.8 | 97.3                                 | 2.7  | 1.58                                 | 0.06 | 0.697 | 1.47                   | 1.45                  |
| XR-S1-B        | 26°19'42" | 107°46'45" | 6.56     | 0.04 | 255.5    | 4.2 | 149.0                                | 4.3  | 1.70                                 | 0.07 | 0.706 | 1.52                   | 1.50                  |
| WS-S3-B        | 27°31'29" | 109°13'41" | 6.43     | 0.05 | 135.7    | 2.4 | 280.2                                | 9.2  | 1.86                                 | 0.08 | 0.749 | 1.54                   | 1.49                  |
| WS-S4-B        | 27°31'28" | 109°13'41" | 7.44     | 0.12 | 131.8    | 2.0 | 333.4                                | 10.6 | 1.86                                 | 0.06 | 0.682 | 1.47                   | 1.41                  |
| WS-S4-B6       | 27°31'29" | 109°13'42" | 2.51     | 0.04 | 40.0     | 0.9 | 373.9                                | 16.5 | 1.95                                 | 0.11 | 0.662 | 1.52                   | 1.45                  |

All uncertainties shown are 2 $\sigma$ . Rho is the association error correlation (Ludwig, 1980).  $^a\text{IOs}$  calculated at 430 Ma,  $^b\text{IOs}$  calculated at 70 Ma,  $^c\text{IOs}$  calculated at 80 Ma.
